# Supplementary material for: Reactive oxygen species do not contribute to ObgE*-mediated programmed cell death
Source: PubMed Central journal article supplement (PMC5027388; doi:10.1038/srep33723), 2016-09-19
Supplement: srep33723-s1.pdf [file srep33723-s1.pdf]

## Supplementary Information

### Reactive oxygen species do not contribute to ObgE\*-mediated programmed cell death

Liselot Dewachter, Pauline Herpels, Natalie Verstraeten, Maarten Fauvart, Jan Michiels

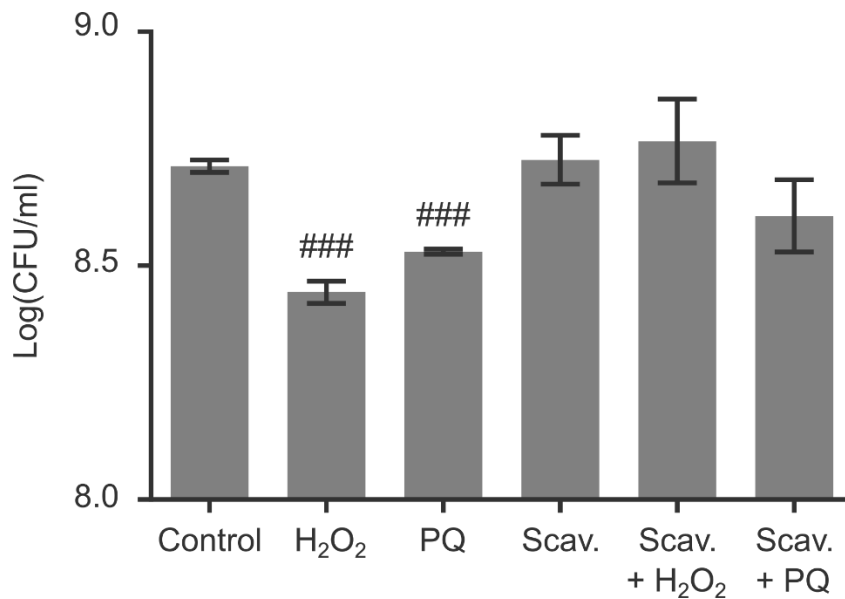

**Supplementary Figure S1: The combination of selected scavengers increases survival in the presence of oxidative stress.** Oxidative stress was imposed upon an exponential-phase culture of *E. coli* pBAD33 by adding 100  $\mu$ M H<sub>2</sub>O<sub>2</sub> or 20 mM paraquat (PQ). Survival was measured in the presence or absence of the combination of scavengers (Scav.); DMSO, pyruvate and MnTBAP. Error bars represent the standard error of the mean, n = 3. Student's t test: ###p-value < 0.001 in comparison with 'Control' (no scavengers and no oxidative stress).
